# Supplementary material
Source: Springer Nature journal article supplement (https://www.springermedizin.de/resource/supplementary/12943_2010_886_MOESM4_ESM.pdf/9551930)

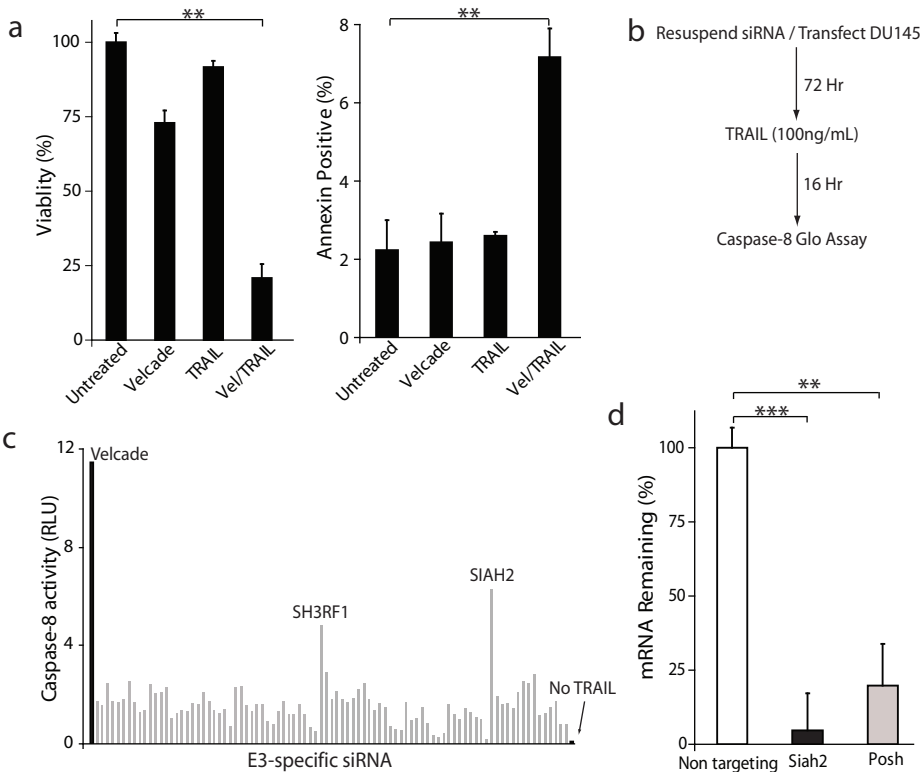

Supplement: MOESM4 [file 9551930]
